# Supplementary material for: Autoantibody-positivity before and seroconversion during treatment with anti-PD-1 is associated with immune-related adverse events in patients with melanoma
Source: HighWire-hosted journal article supplement (doi:10.1136/jitc-2024-009215), 2024-06-01
Supplement: jitc-2024-009215supp001_data_supplement.pdf [file jitc-2024-009215supp001_data_supplement.pdf]

**Supplementary Figure 1.** Anti-TPO and anti-Tg positivity at baseline and on treatment.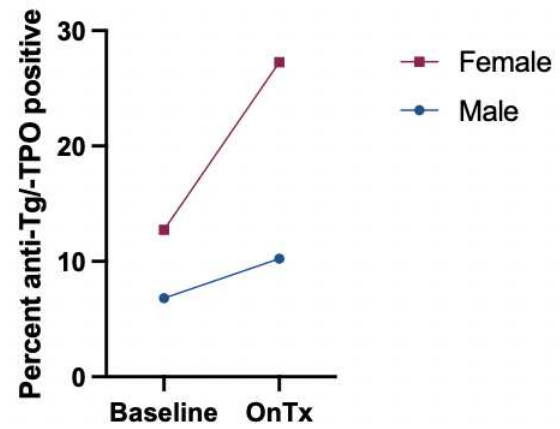

**Supplementary Table 1. A) Association between anti-TPO and/or anti-Tg positivity and thyroiditis at baseline; B) Association between anti-TPO and/or anti-Tg conversion and thyroiditis; C) Association between on treatment positivity for either anti-TPO or anti-Tg and thyroiditis**

| <b>A</b>                                   | <b>Baseline positive for...</b>  | <b>Baseline negative for...</b> | <b>p-value</b> | <b>Odds-ratio (95%CI)</b> |
|--------------------------------------------|----------------------------------|---------------------------------|----------------|---------------------------|
| <b>Thyroiditis/anti-TPO</b>                | 5/7 (71.4%)                      | 20/136 (14.7%)                  | 0.002          | 14.50 (2.63-79.94)        |
| <b>Thyroiditis/anti-Tg</b>                 | 4/7 (57.1%)                      | 21/136 (15.4%)                  | 0.013          | 7.30 (1.52-35.01)         |
| <b>Thyroiditis/anti-TPO and/or anti-Tg</b> | 9/13 (69.2%)                     | 16/130 (12.3%)                  | <0.001         | 16.0 (4.42-58.2)          |
| <b>B</b>                                   | <b>Converted positive for...</b> | <b>Stayed negative for...</b>   | <b>p-value</b> | <b>Odds-ratio (95%CI)</b> |
| <b>Thyroiditis/anti-TPO</b>                | 5/6 (83.3%)                      | 15/130 (11.5%)                  | 0.001          | 38.3 (4.19-350)           |
| <b>Thyroiditis/anti-Tg</b>                 | 9/15 (60.0%)                     | 12/121 (9.9%)                   | <0.001         | 13.6 (4.13-44.9)          |
| <b>Thyroiditis/anti-TPO and/or anti-Tg</b> | 11/19 (57.9%)                    | 7/118 (5.9%)                    | <0.001         | 21.8 (6.64-71.6)          |
| <b>C</b>                                   | <b>OnTx positive for...</b>      | <b>OnTx negative for...</b>     | <b>p-value</b> | <b>Odds-ratio (95%CI)</b> |
| <b>Thyroiditis/anti-TPO</b>                | 8/12 (66.7%)                     | 14/131 (10.7%)                  | <0.001         | 16.7 (4.46-63.0)          |
| <b>Thyroiditis/anti-Tg</b>                 | 12/22 (54.5%)                    | 10/121 (8.26%)                  | <0.001         | 13.3 (4.62-38.4)          |
| <b>Thyroiditis/anti-TPO and/or anti-Tg</b> | 14/24 (58.3%)                    | 8/119 (6.7%)                    | <0.001         | 19.4 (6.58-57.4)          |

In each cell, n/N indicates the number of patients who developed thyroiditis (n) out of the total number of patients who converted positive or stayed negative for the indicated antibody (N).

## Supplementary appendix 1. irAEs of patients with known auto-immune diseases

- Coeliac disease: no toxicities
- Ulcerative colitis: no toxicities
- Ulcerative colitis: dry mouth grade 2, diarrhea grade 2
- DM type 1: dry mouth grade 1, skin hypopigmentation grade 1
- Hypothyroidism: hypothyroidism grade 2 (requiring increase in replacement treatment)
- Psoriasis: grade 3 Hyperthyroidism, grade 2 hypothyroidism
- Rheumatoid arthritis: arthralgia grade 2, dry mouth grade 1, dry eyes grade 1, rash maculo-popular grade 2, arthritis grade 3
